# Supplementary material for: The Effects of Cellular Membrane Damage on the Long-Term Storage and Adhesion of Probiotic Bacteria in Caco-2 Cell Line
Source: MDPI journal article supplement (doi:10.3390/nu15153484), 2023-08-07
Supplement: s1 [file s1]

Table S1. Dried samples

| sample                        | m0       | m1       | m2       | m3       | m6               | m9               | m12              |
|-------------------------------|----------|----------|----------|----------|------------------|------------------|------------------|
| <i>E. Faecium</i> -<br>20 pow | 8.73E+09 | 8.49E+09 | 9.95E+09 | 8.12E+09 | 6.18E+08         | 7.85E+07         | <10 <sup>6</sup> |
| EF -20 N2                     | 8.73E+09 | 9.41E+09 | 8.98E+09 | 8.20E+09 | 2.90E+09         | 4.61E+07         | 6.64E+06         |
| EF -20 V                      | 8.73E+09 | 7.09E+09 | 8.74E+09 | 7.58E+09 | 9.82E+08         | 2.80E+07         | 5.45E+06         |
| EF 4 pow                      | 8.73E+09 | 8.59E+09 | 8.76E+08 | 2.98E+08 | 8.98E+06         | <10 <sup>6</sup> | <10 <sup>6</sup> |
| EF 4 N2                       | 8.73E+09 | 9.39E+09 | 9.28E+08 | 3.86E+08 | 6.03E+07         | 4.02E+06         | <10 <sup>6</sup> |
| EF 4 V                        | 8.73E+09 | 8.83E+09 | 8.28E+08 | 3.04E+08 | 7.00E+07         | 3.81E+06         | <10 <sup>6</sup> |
| EF 20 pow                     | 8.73E+09 | 6.00E+09 | 7.99E+08 | 8.32E+07 | <10 <sup>6</sup> | <10 <sup>6</sup> | <10 <sup>6</sup> |
| EF 20 N2                      | 8.73E+09 | 6.38E+09 | 6.89E+08 | 1.92E+08 | <10 <sup>6</sup> | <10 <sup>6</sup> | <10 <sup>6</sup> |
| EF 20 V                       | 8.73E+09 | 5.43E+09 | 7.12E+08 | 9.50E+07 | <10 <sup>6</sup> | <10 <sup>6</sup> | <10 <sup>6</sup> |
| LM -20 pow                    | 5.55E+09 | 5.36E+09 | 4.68E+09 | 3.66E+09 | 1.85E+08         | 3.06E+07         | <10 <sup>6</sup> |
| LM -20 N2                     | 5.55E+09 | 4.92E+09 | 5.32E+09 | 4.80E+09 | 7.36E+08         | 1.20E+08         | 4.95E+06         |
| LM -20 V                      | 5.55E+09 | 4.65E+09 | 4.99E+09 | 4.22E+09 | 8.19E+08         | 8.08E+07         | 2.88E+06         |
| LM 4 pow                      | 5.55E+09 | 5.55E+09 | 8.77E+08 | 2.90E+08 | 2.75E+07         | <10 <sup>6</sup> | <10 <sup>6</sup> |
| LM 4 N2                       | 5.55E+09 | 4.96E+09 | 7.90E+08 | 3.92E+08 | 4.84E+07         | <10 <sup>6</sup> | <10 <sup>6</sup> |
| LM 4 V                        | 5.55E+09 | 5.64E+09 | 7.68E+08 | 4.06E+08 | 3.82E+07         | <10 <sup>6</sup> | <10 <sup>6</sup> |
| LM 20 pow                     | 5.55E+09 | 2.86E+09 | 4.98E+08 | 6.30E+07 | <10 <sup>6</sup> | <10 <sup>6</sup> | <10 <sup>6</sup> |
| LM 20 N2                      | 5.55E+09 | 3.39E+09 | 5.10E+08 | 8.42E+07 | <10 <sup>6</sup> | <10 <sup>6</sup> | <10 <sup>6</sup> |
| LM 20 V                       | 5.55E+09 | 3.16E+09 | 5.70E+08 | 8.10E+07 | <10 <sup>6</sup> | <10 <sup>6</sup> | <10 <sup>6</sup> |

Table S2. Coated samples

| sample     | m0       | m1       | m2       | m3       | m6               | m9               | m12              |
|------------|----------|----------|----------|----------|------------------|------------------|------------------|
| EF -20 pow | 9.42E+08 | 8.54E+08 | 7.30E+08 | 5.27E+08 | 8.73E+07         | 6.28E+06         | <10 <sup>6</sup> |
| EF -20 N2  | 9.42E+08 | 9.93E+08 | 9.78E+08 | 7.28E+08 | 2.09E+08         | 9.35E+07         | 2.90E+07         |
| EF -20 V   | 9.42E+08 | 8.57E+08 | 8.39E+08 | 8.37E+08 | 2.89E+08         | 8.92E+07         | 9.21E+06         |
| EF 4 pow   | 9.42E+08 | 9.20E+08 | 7.82E+08 | 3.68E+08 | 1.85E+07         | <10 <sup>6</sup> | <10 <sup>6</sup> |
| EF 4 N2    | 9.42E+08 | 7.83E+08 | 6.73E+08 | 4.89E+08 | 7.89E+07         | 1.87E+07         | <10 <sup>6</sup> |
| EF 4 V     | 9.42E+08 | 8.23E+08 | 7.39E+08 | 3.90E+08 | 6.91E+07         | 9.02E+07         | <10 <sup>6</sup> |
| EF 20 pow  | 9.42E+08 | 6.93E+08 | 9.20E+07 | 3.87E+06 | <10 <sup>6</sup> | <10 <sup>6</sup> | <10 <sup>6</sup> |
| EF 20 N2   | 9.42E+08 | 7.48E+08 | 8.21E+07 | 8.70E+06 | <10 <sup>6</sup> | <10 <sup>6</sup> | <10 <sup>6</sup> |
| EF 20 V    | 9.42E+08 | 7.38E+08 | 8.32E+07 | 7.89E+06 | <10 <sup>6</sup> | <10 <sup>6</sup> | <10 <sup>6</sup> |
| LM -20 pow | 7.58E+08 | 8.90E+08 | 6.90E+08 | 5.09E+08 | 8.02E+07         | 1.89E+07         | <10 <sup>6</sup> |
| LM -20 N2  | 7.58E+08 | 7.83E+08 | 7.02E+08 | 6.82E+08 | 2.01E+08         | 6.01E+07         | 8.78E+06         |
| LM -20 V   | 7.58E+08 | 8.31E+08 | 7.89E+08 | 6.89E+08 | 1.82E+08         | 7.48E+07         | 6.70E+06         |
| LM 4 pow   | 7.58E+08 | 7.39E+08 | 4.83E+08 | 7.92E+07 | 2.90E+07         | <10 <sup>6</sup> | <10 <sup>6</sup> |
| LM 4 N2    | 7.58E+08 | 7.38E+08 | 6.72E+08 | 5.98E+08 | 8.91E+07         | 3.02E+07         | <10 <sup>6</sup> |
| LM 4 V     | 7.58E+08 | 6.28E+08 | 6.98E+08 | 3.87E+08 | 7.83E+07         | 9.08E+06         | <10 <sup>6</sup> |
| LM 20 pow  | 7.58E+08 | 3.29E+08 | 8.75E+07 | 6.48E+06 | <10 <sup>6</sup> | <10 <sup>6</sup> | <10 <sup>6</sup> |
| LM 20 N2   | 7.58E+08 | 4.80E+08 | 9.83E+07 | 2.84E+07 | <10 <sup>6</sup> | <10 <sup>6</sup> | <10 <sup>6</sup> |
| LM 20 V    | 7.58E+08 | 4.29E+08 | 8.31E+07 | 8.93E+06 | <10 <sup>6</sup> | <10 <sup>6</sup> | <10 <sup>6</sup> |
